# Supplementary material for: Distinctive patterns of epigenetic marks are associated with promoter regions of mouse LINE-1 and LTR retrotransposons
Source: PubMed Central journal article supplement (PMC4177394; doi:10.1186/1759-8753-4-27), 2013-12-02

# Additional Figure 1

**A**

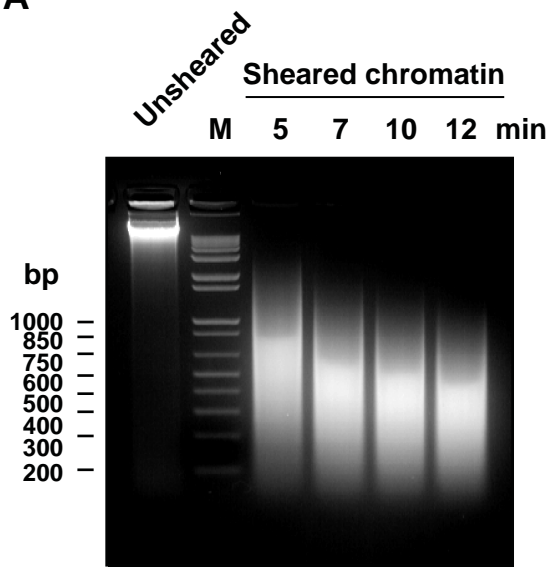

**B**

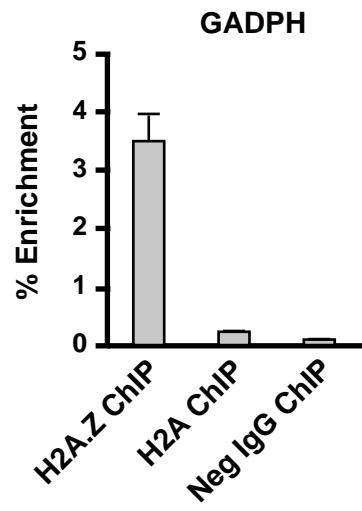

Supplement: 1759-8753-4-27-S1.pdf [file 1759-8753-4-27-S1.pdf]
